# Supplementary material for: SARS-CoV-2 viral load is associated with increased disease severity and mortality
Source: Nat Commun. 2020 Oct 30;11:5493. doi: 10.1038/s41467-020-19057-5 (PMC7603483; doi:10.1038/s41467-020-19057-5)
Supplement: Supplementary file 1 — Supplementary Information [file 41467_2020_19057_MOESM1_ESM.pdf]

SARS-CoV-2 Viral Load is Associated with Increased Disease Severity and Mortality  
Supplementary Figures and Tables

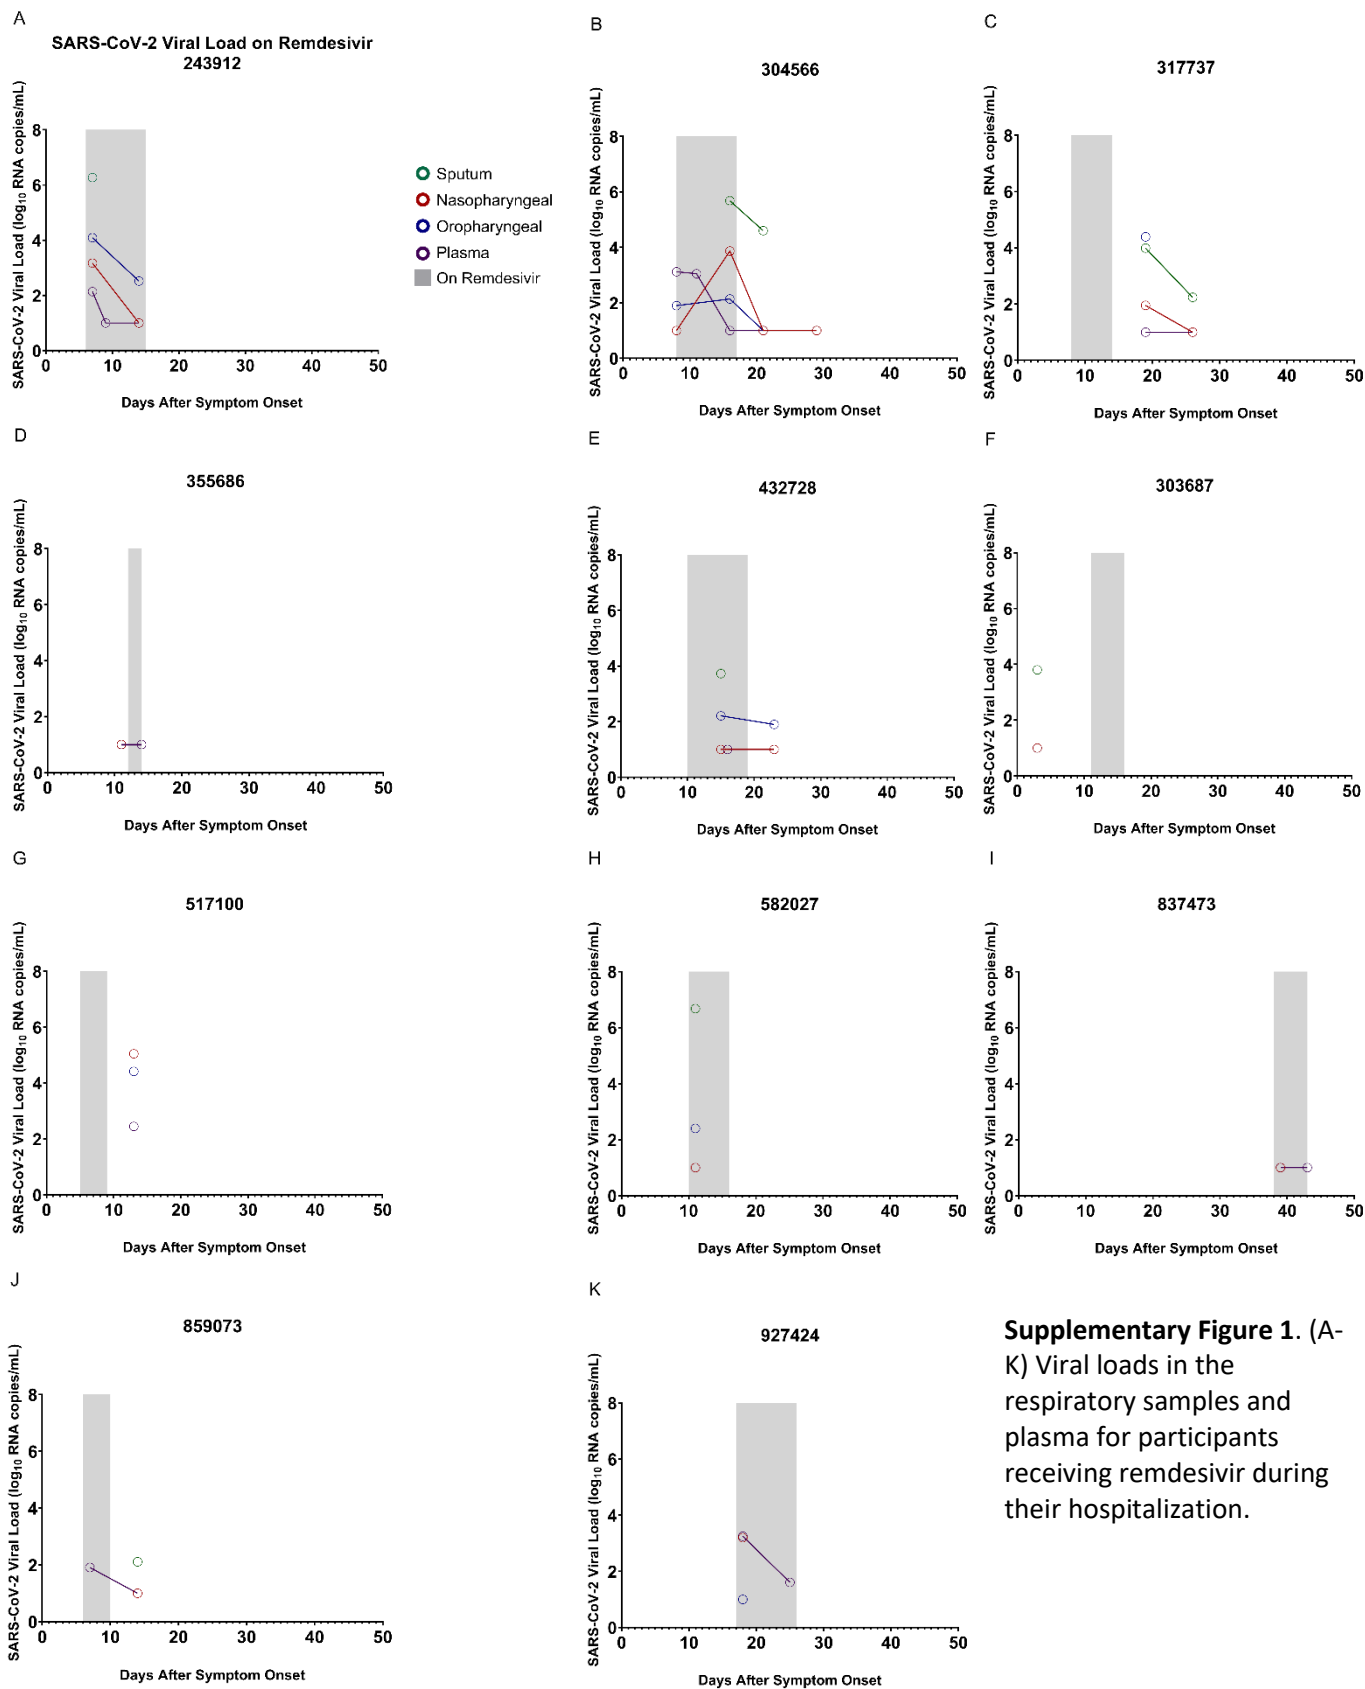

**Supplementary Figure 1.** (A-K) Viral loads in the respiratory samples and plasma for participants receiving remdesivir during their hospitalization.

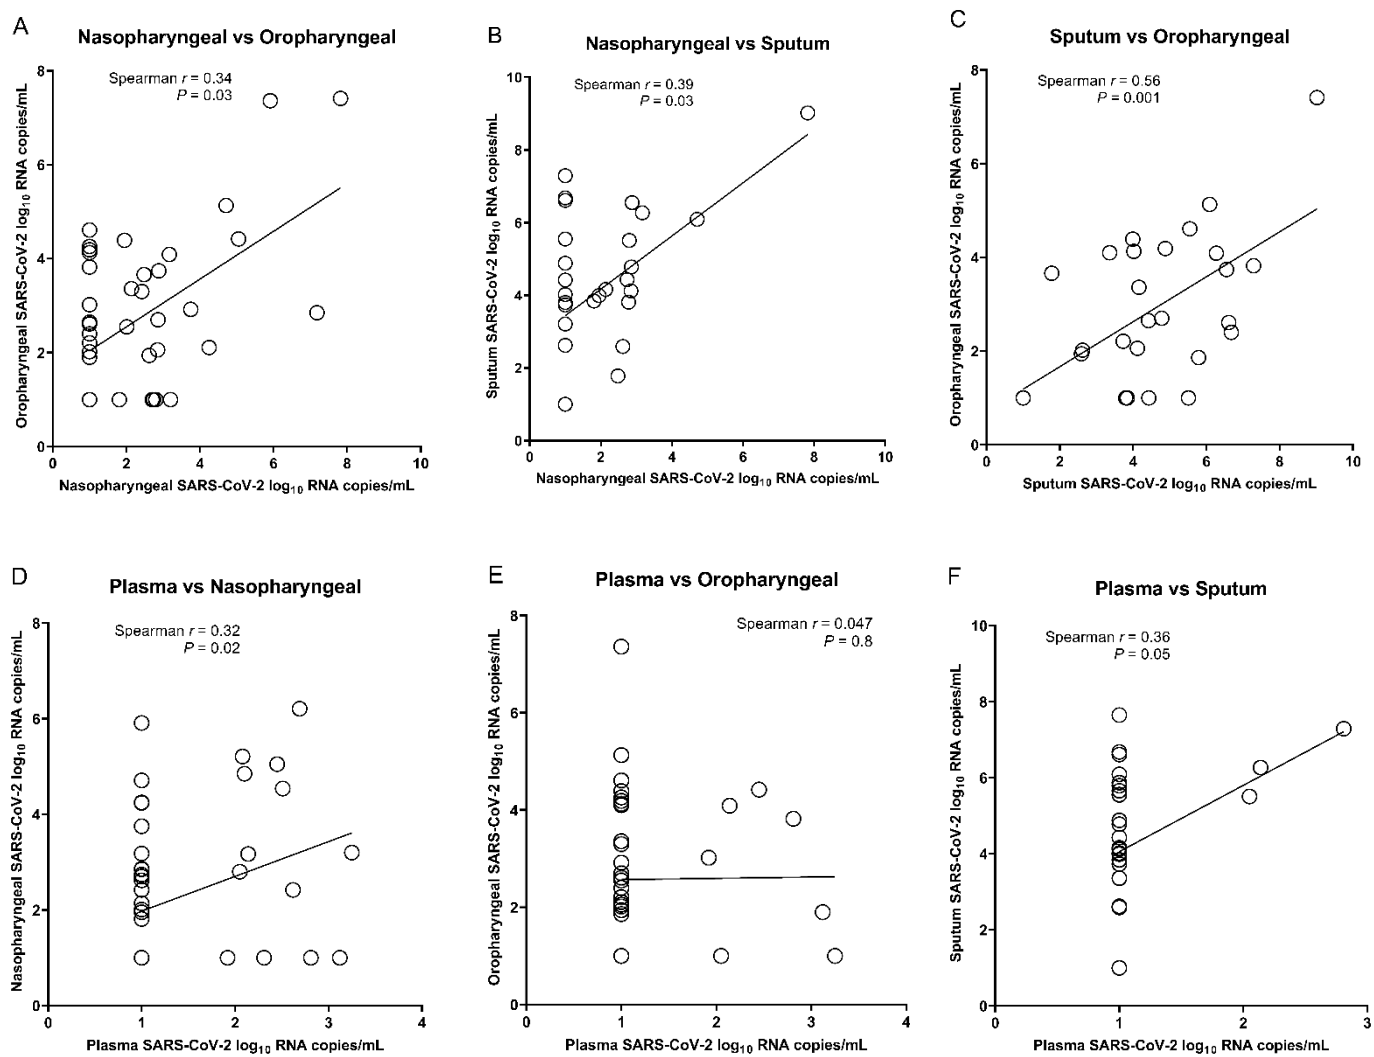

**Supplementary Figure 2.** Correlation of respiratory tract and plasma viral loads. (A) Nasopharyngeal vs Oropharyngeal, (B) Nasopharyngeal vs Sputum, (C) Sputum vs Oropharyngeal, (D) Plasma vs Nasopharyngeal, (E) Plasma vs Oropharyngeal, (F) Plasma vs Sputum. VL, viral load. P-values are from Spearman's correlations.

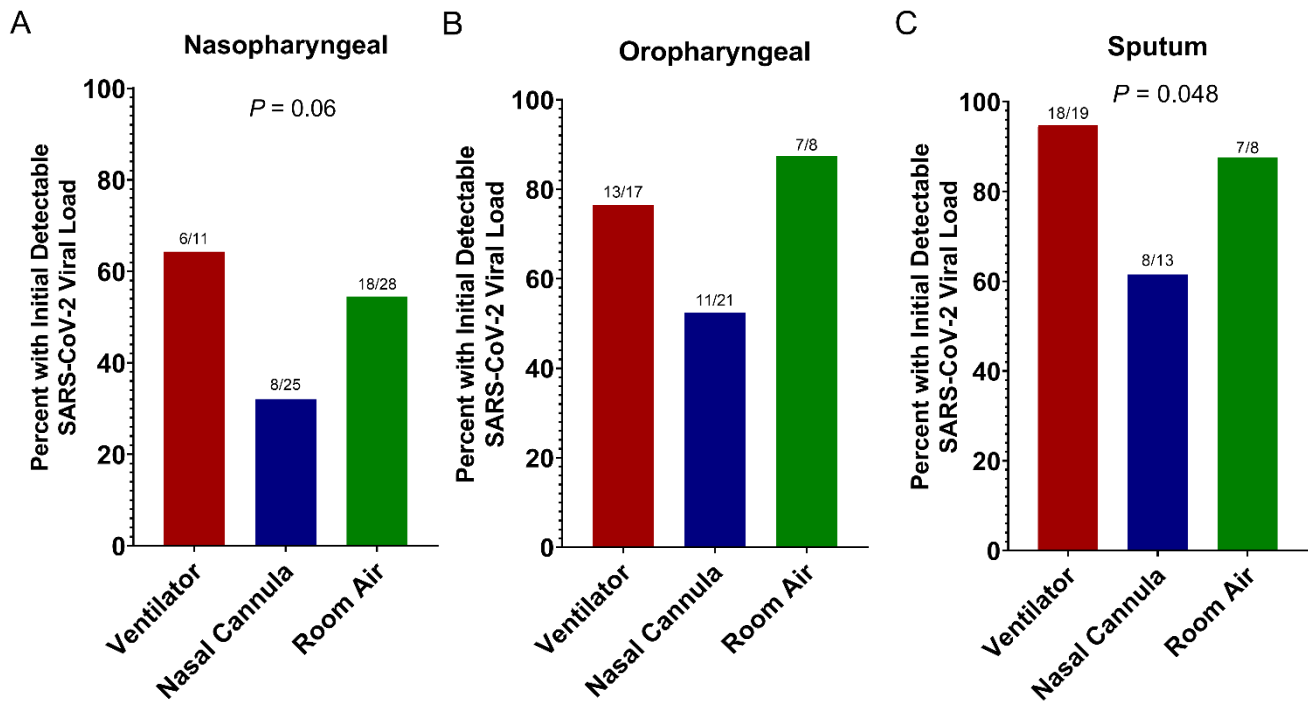

**Supplementary Figure 3.** Percentage of participants with a detectable SARS-CoV-2 viral load from nasopharyngeal swabs (A), oropharyngeal swabs (B), and sputum (C) collected at initial sampling. Data is further categorized by respiratory disease severity. P-values are from  $\chi^2$  analysis.

A

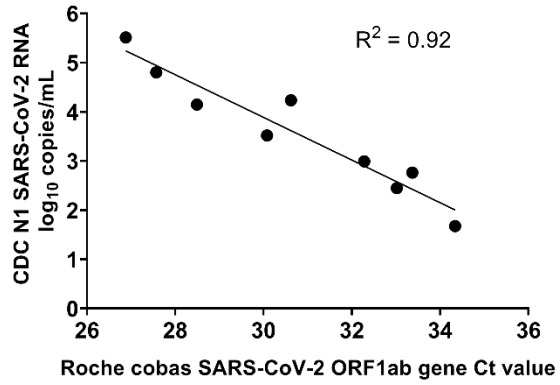

B

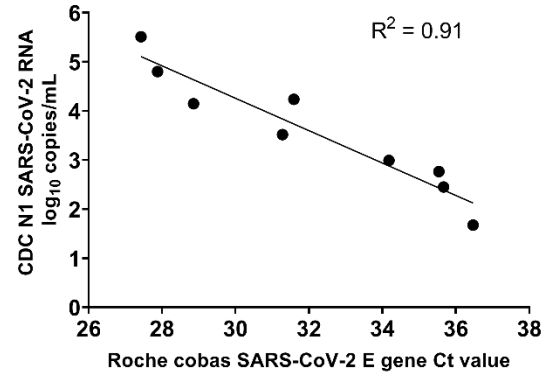

**Supplementary Figure 4.** Correlation of the CDC N1 SARS-CoV-2 viral load assay with the Roche cobas ORF1ab (A) and E (B) gene Ct (cycle threshold) values. P-values are from regression  $R^2$ .

**Supplementary Table 1.** Logistic regression analysis of association of viral load with risk of death

| <b>Specimen Type</b> | <b>Variable type<sup>1</sup></b> | <b>Odds Ratio</b> | <b>P-value</b> |
|----------------------|----------------------------------|-------------------|----------------|
| Plasma               | Categorical                      | 5.5               | <b>0.02</b>    |
| Nasopharyngeal       | Categorical                      | 2.4               | 0.25           |
| Oropharyngeal        | Categorical                      | 3.5               | 0.27           |
| Sputum <sup>2</sup>  | Categorical                      | -                 | -              |
| Plasma               | Continuous                       | 2.4               | <b>0.04</b>    |
| Nasopharyngeal       | Continuous                       | 1.4               | 0.09           |
| Oropharyngeal        | Continuous                       | 2.1               | <b>0.02</b>    |
| Sputum               | Continuous                       | 2.8               | <b>0.048</b>   |

<sup>1</sup>Categorical refers to analysis of viral loads as detectable or not detectable

<sup>2</sup>There were no deaths in participants with undetectable sputum viral loads

<sup>3</sup>P-values have been bolded to highlight significance

**Supplementary Table 2.** Details of the participants who died. Primary causes of death as noted in the medical chart. Additional factors that may have contributed to death are also noted.

| No. | Age | Sex | Plasma SARS-CoV-2 RNA positive | Significant past medical conditions             | Primary causes of death                            | Secondary causes of death                                                                                        |
|-----|-----|-----|--------------------------------|-------------------------------------------------|----------------------------------------------------|------------------------------------------------------------------------------------------------------------------|
| 1   | 80  | M   | No                             | Diabetes, coronary artery disease, hypertension | Respiratory failure                                | COVID-19, bacterial pneumonia, acute kidney injury                                                               |
| 2   | 69  | F   | No                             | Diabetes, hypertension, obesity                 | Respiratory failure                                | COVID-19, bacterial pneumonia, acute kidney injury, septic shock                                                 |
| 3   | 57  | M   | No                             | Asthma, obesity                                 | Respiratory failure, cerebral edema and hemorrhage | COVID-19, septic shock                                                                                           |
| 4   | 79  | M   | No                             | COPD, diabetes, hypertension                    | Respiratory failure                                | COVID-19, bacterial pneumonia, acute kidney injury, septic shock                                                 |
| 5   | 69  | F   | Not available                  | Goiter                                          | Respiratory failure                                | COVID-19, bacterial pneumonia, acute kidney injury, septic shock                                                 |
| 6   | 84  | M   | Yes                            | Diabetes, cirrhosis                             | Respiratory failure                                | COVID-19, ileus, bacterial pneumonia, septic shock                                                               |
| 7   | 85  | M   | Yes                            | Hypertension                                    | Respiratory failure                                | COVID-19, septic shock                                                                                           |
| 8   | 72  | M   | Yes                            | Obesity                                         | Respiratory failure                                | COVID-19, bacterial pneumonia, acute kidney injury, septic shock                                                 |
| 9   | 70  | M   | Yes                            | COPD, head and neck cancer                      | Respiratory failure                                | COVID-19, head and neck cancer, ileus, bacterial pneumonia, non-ST-elevation myocardial infarction, septic shock |
| 10  | 76  | M   | Yes                            | Hypertension                                    | Respiratory failure                                | COVID-19, bacterial pneumonia, acute kidney injury, possible pulmonary embolism, septic shock                    |
| 11  | 79  | M   | Yes                            | Hypertension                                    | Respiratory failure                                | COVID-19, acute kidney injury, septic shock, bacterial pneumonia, atrial fibrillation                            |

SARS-CoV-2, severe acute respiratory syndrome coronavirus 2; COVID-19, coronavirus disease 19; COPD, chronic obstructive pulmonary disease

**Supplementary Table 3.** Complete list of primers.

| Primer Name    | Assay      | Sequence (5' -> 3')                      |
|----------------|------------|------------------------------------------|
| 2019-nCoV_N1-F | SARS-CoV-2 | GAC CCC AAA ATC AGC GAA AT               |
| 2019-nCoV_N1-R | SARS-CoV-2 | TCT GGT TAC TGC CAG TTG AAT CTG          |
| 2019-nCoV_N1-P | SARS-CoV-2 | FAM-ACC CCG CAT TAC GTT TGG TGG ACC-BHQ1 |
| RCAS-F         | RCAS       | GTC AAT AGA GAG AGG GAT GGA CAA A        |
| RCAS-R         | RCAS       | TCC ACA AGT GTA GCA GAG CCC              |
| RCAS-P         | RCAS       | FAM- TGG GTC GGG TGG TCG TGC C-TAMRA     |
| IPO8-F         | IPO8       | Biorad Unique Assay ID: qHsaCED0005354   |
| IPO8-R         | IPO8       | Biorad Unique Assay ID: qHsaCED0005354   |
